# Supplementary material for: The kinesin-5 tail domain directly modulates the mechanochemical cycle of the motor domain for anti-parallel microtubule sliding
Source: eLife journal article supplement (doi:10.7554/elife.51131), 2020-01-20

**A**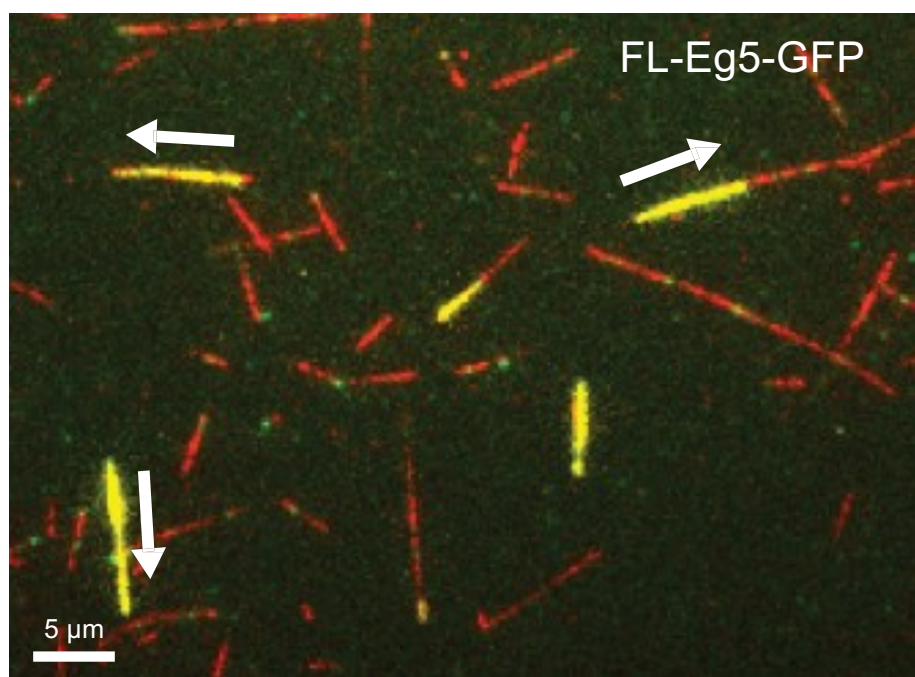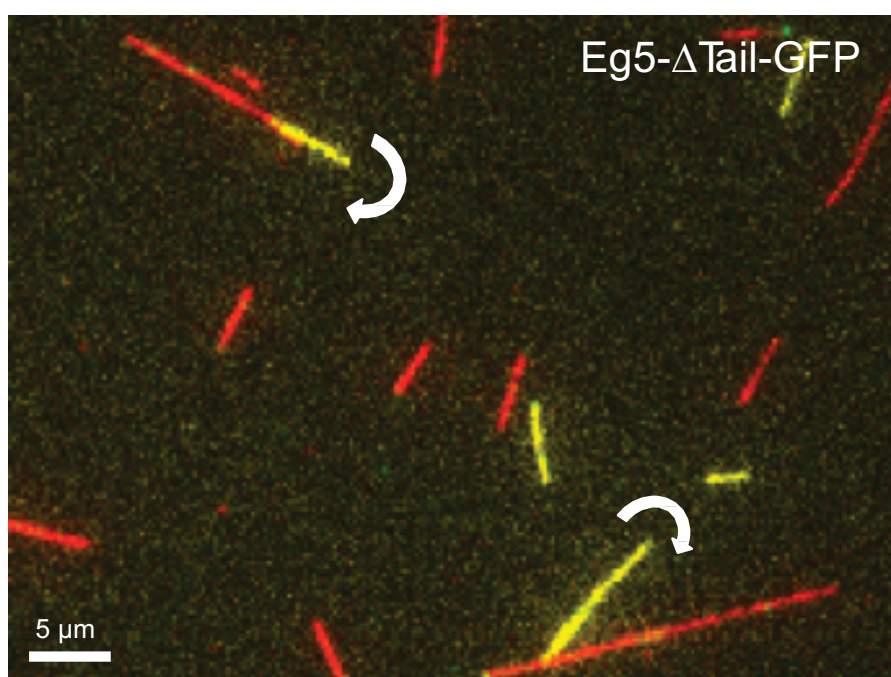**B**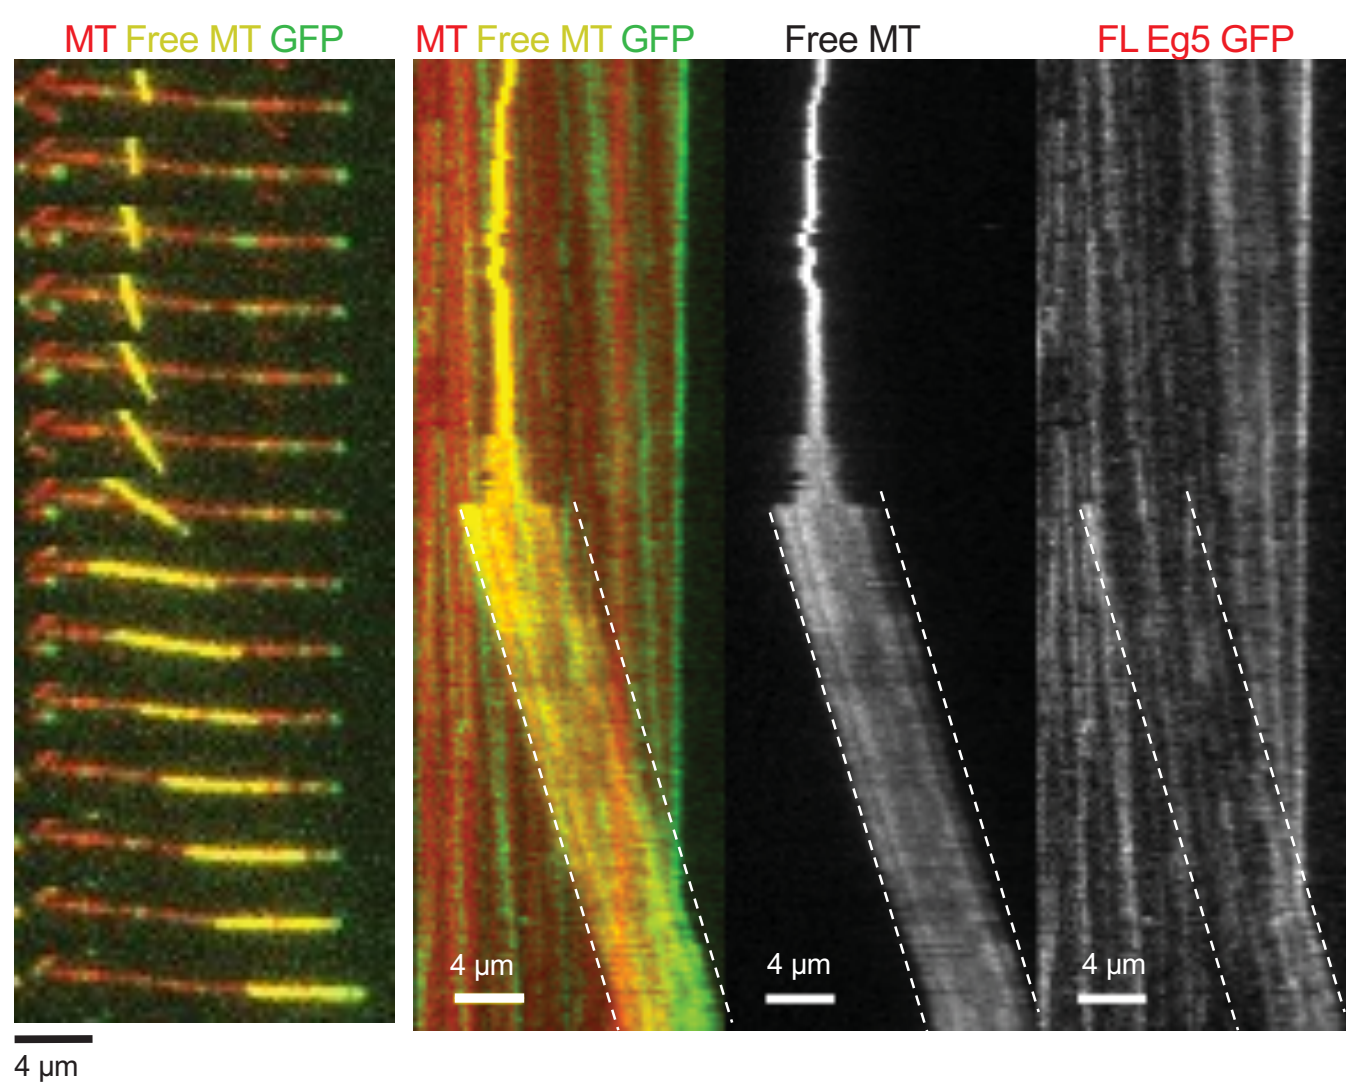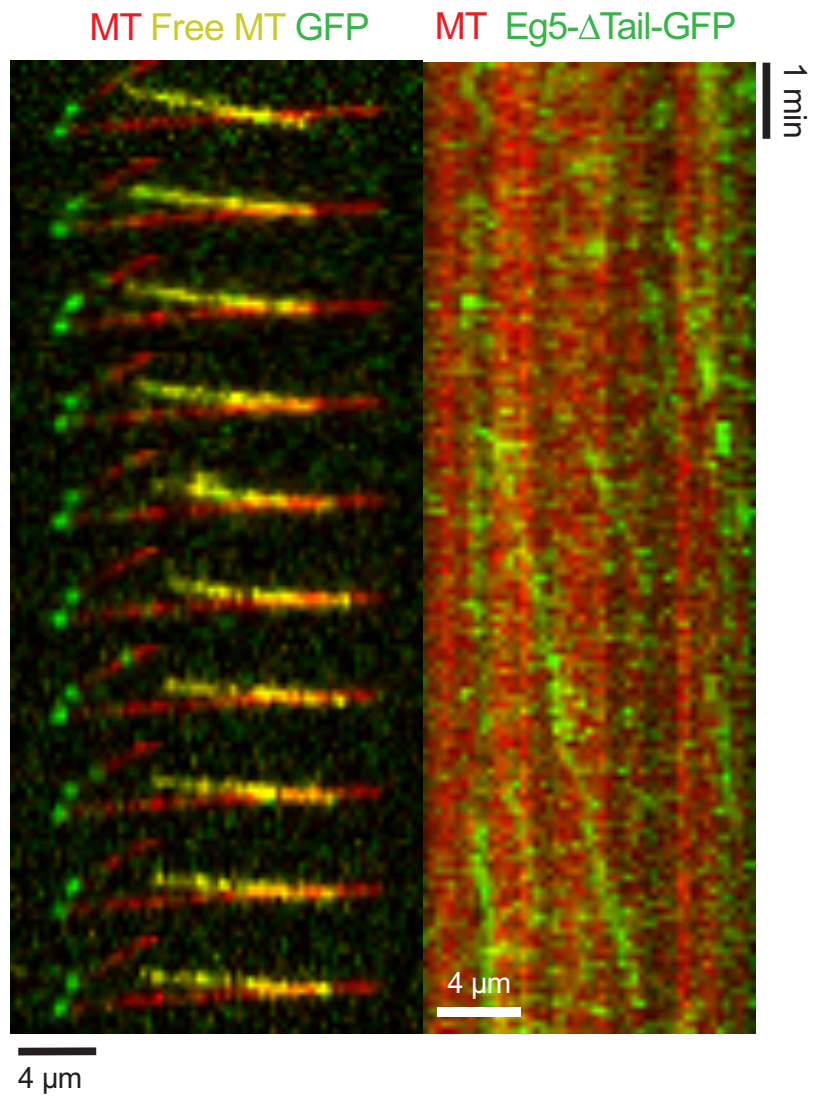**C**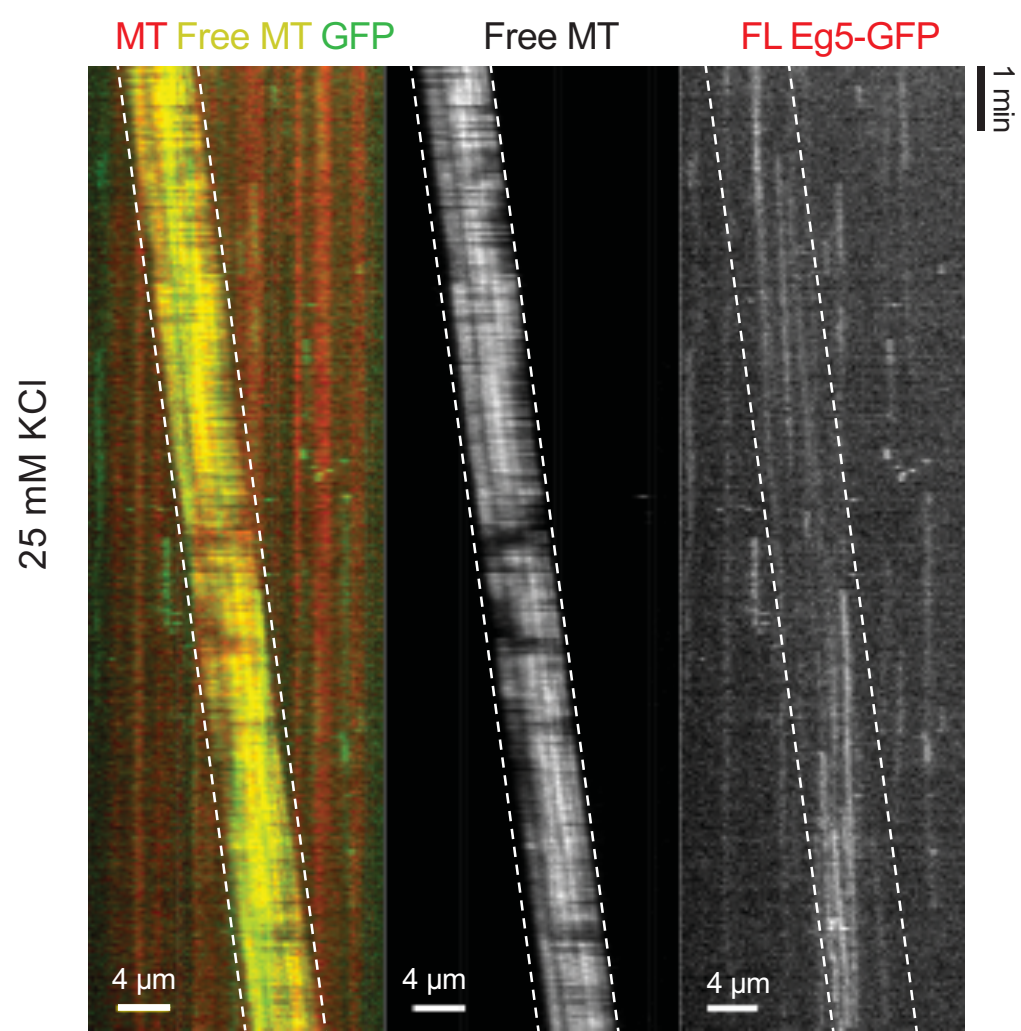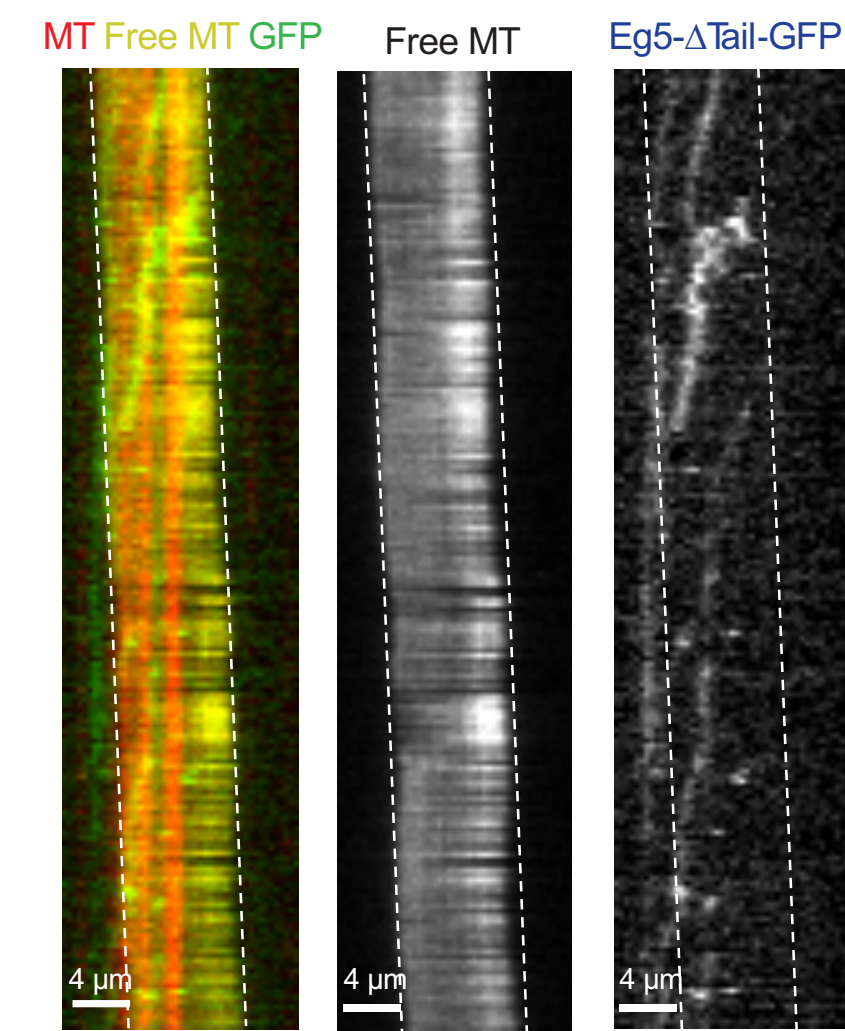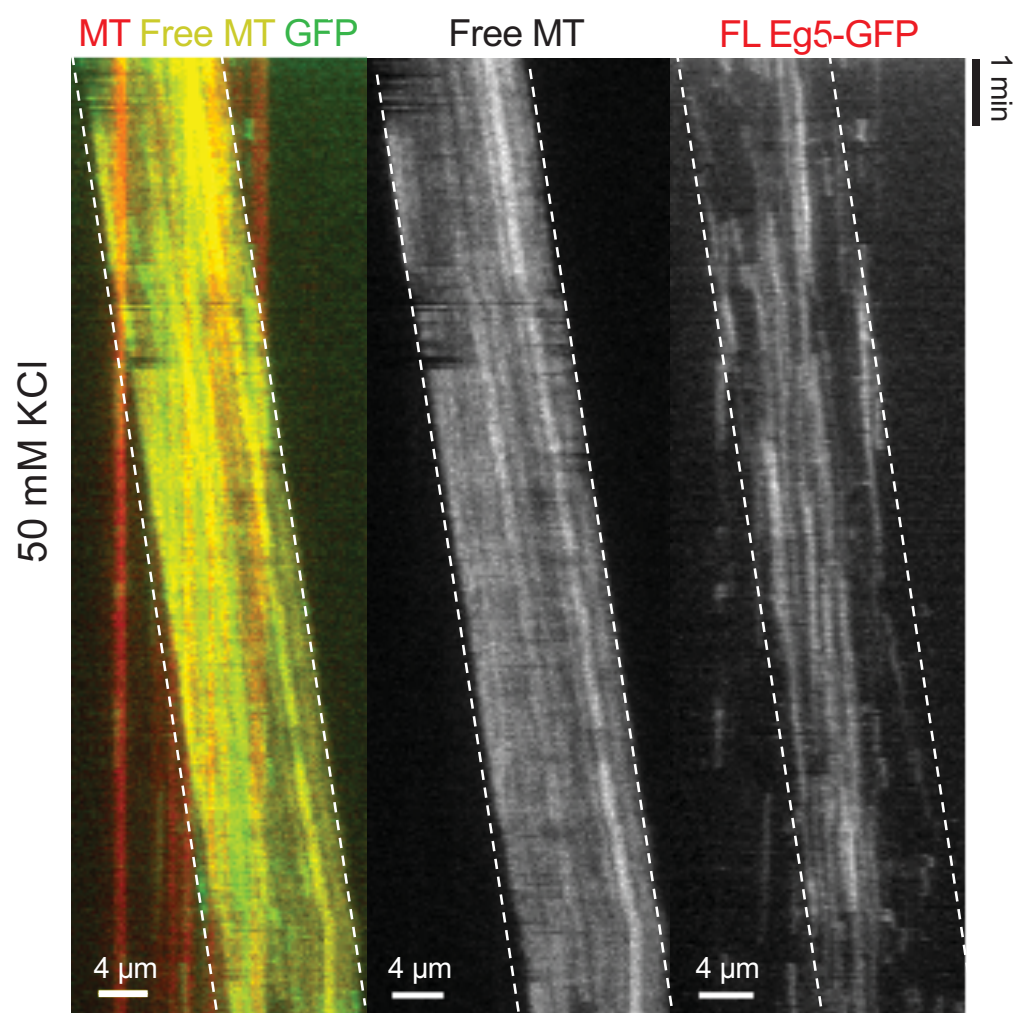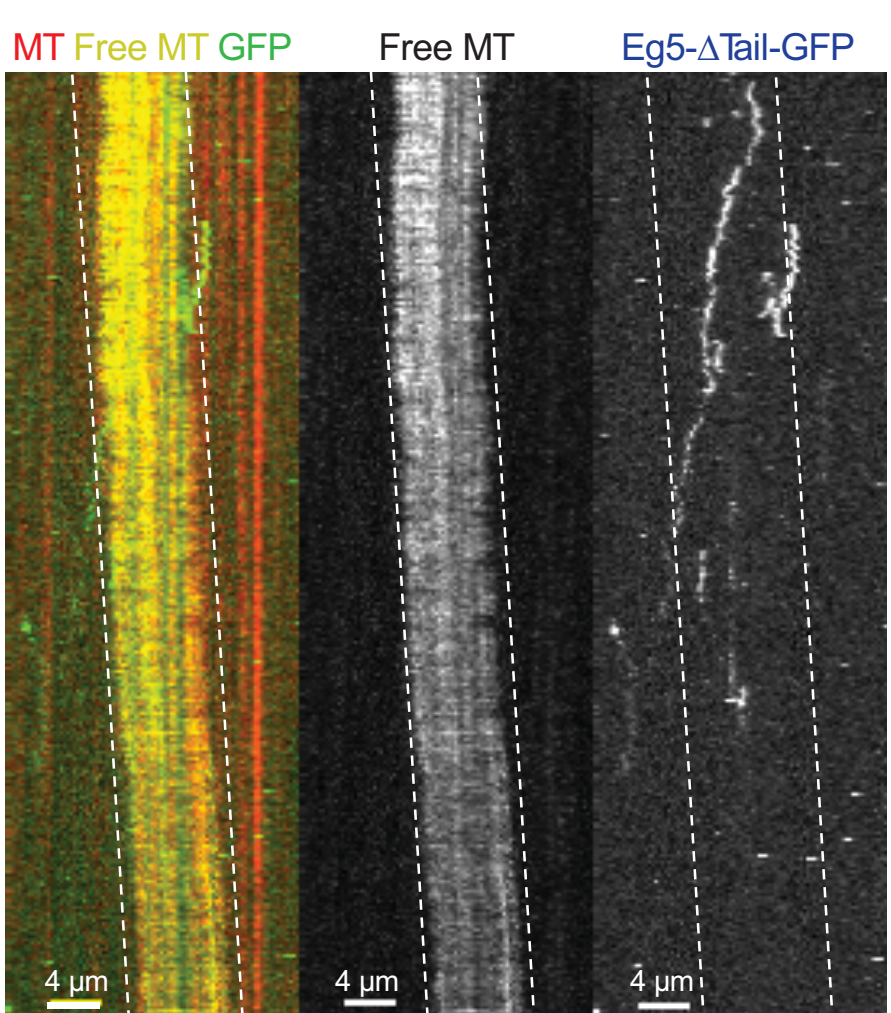**D** Motility (Single MTs)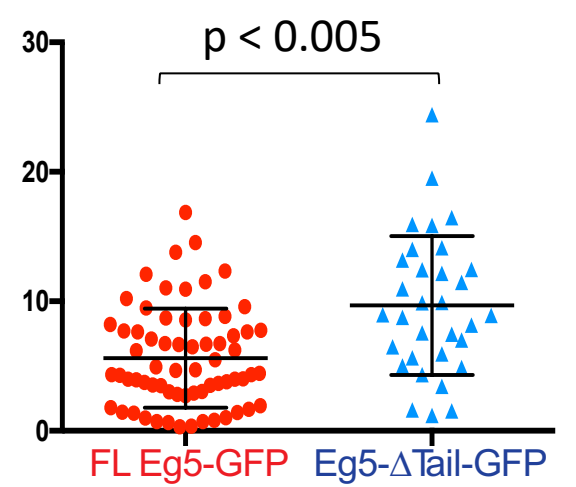

Motility (overlap zones)

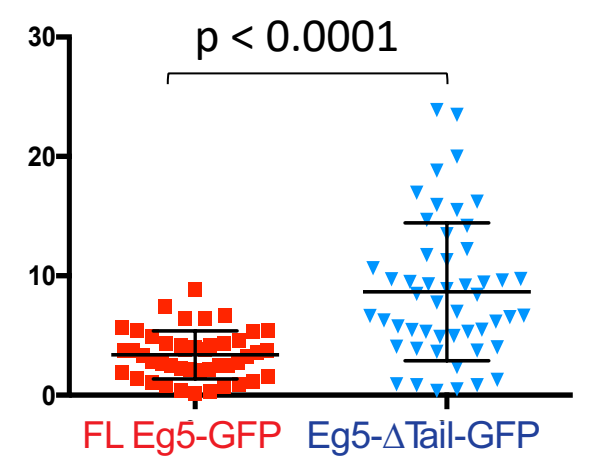FL-Eg5-GFP motility  
 $p < 0.0001$ 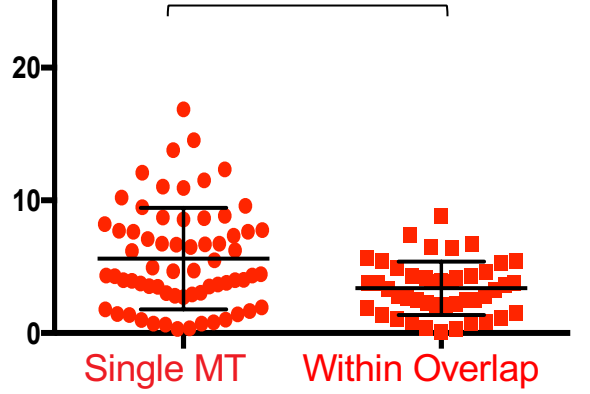Eg5- $\Delta$ Tail-GFP motility  
ns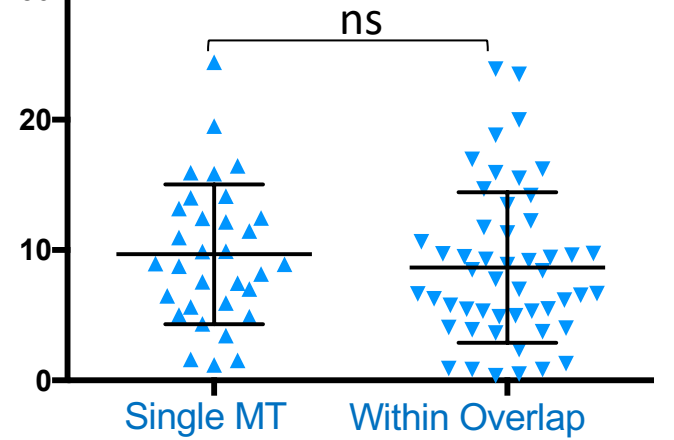

Supplement: supp [file elife-51131-supp-v1.zip]
