# Supplementary figures and images for: The kinesin-5 tail domain directly modulates the mechanochemical cycle of the motor domain for anti-parallel microtubule sliding
Source: eLife journal article supplement (doi:10.7554/elife.51131), 2020-01-20

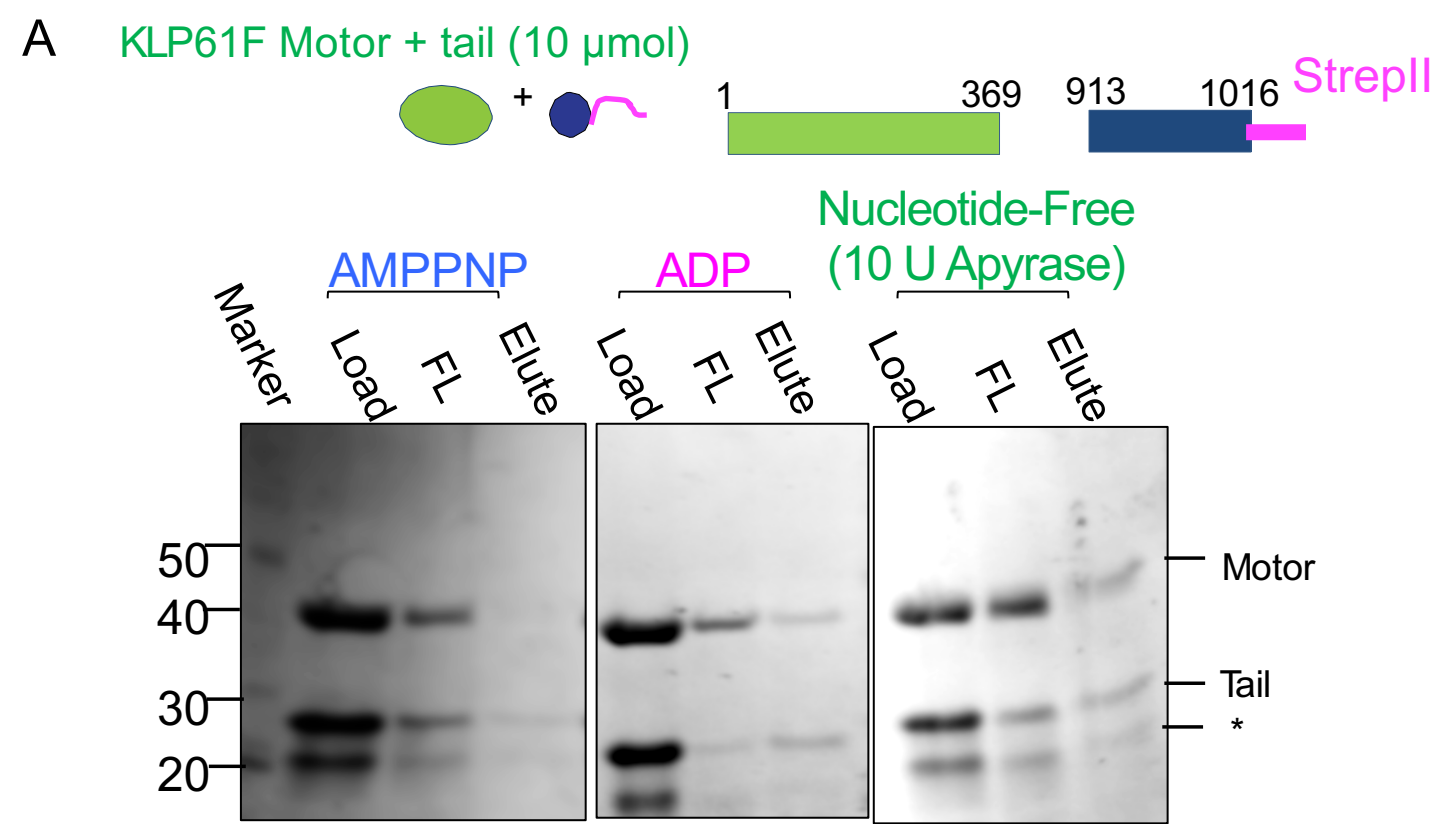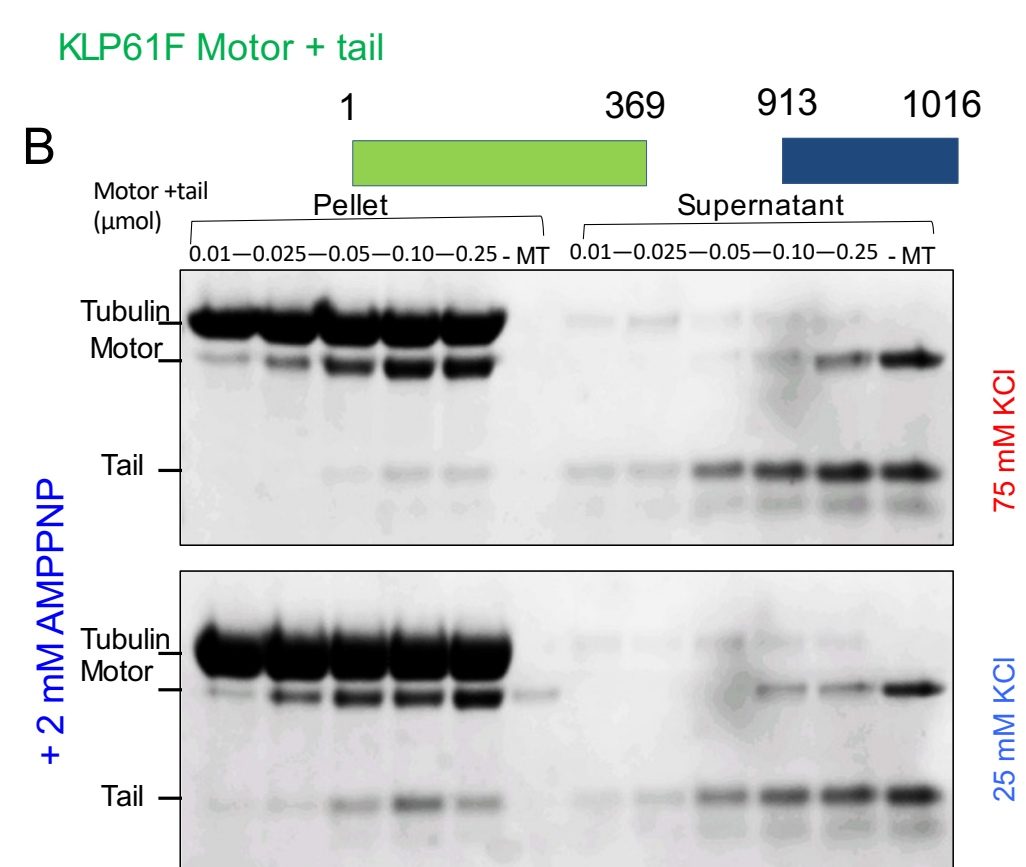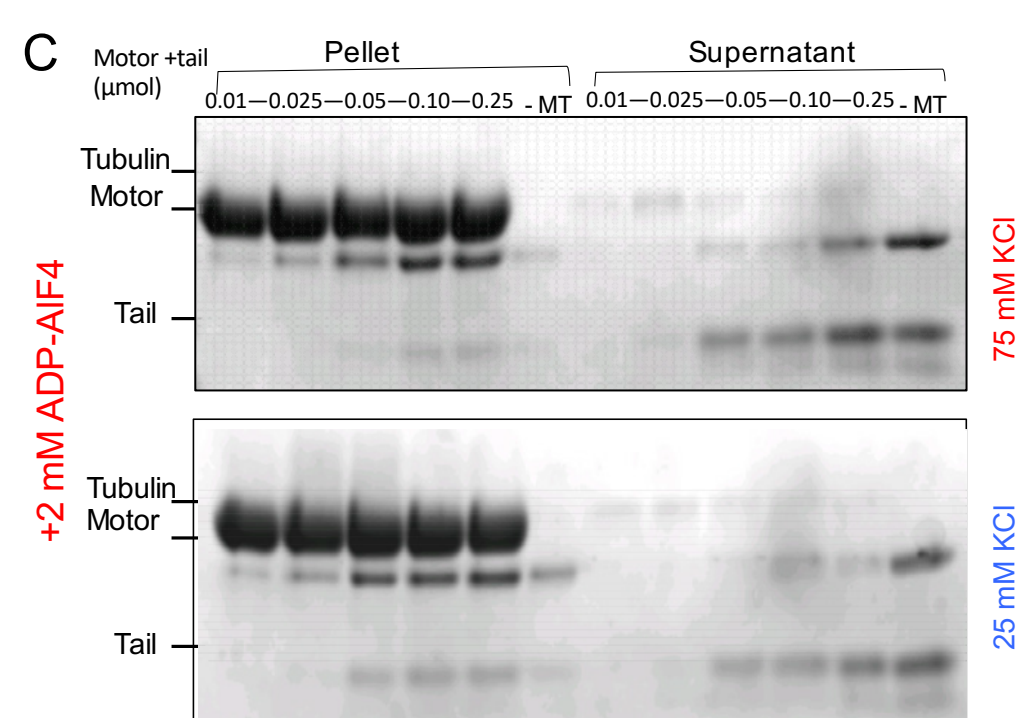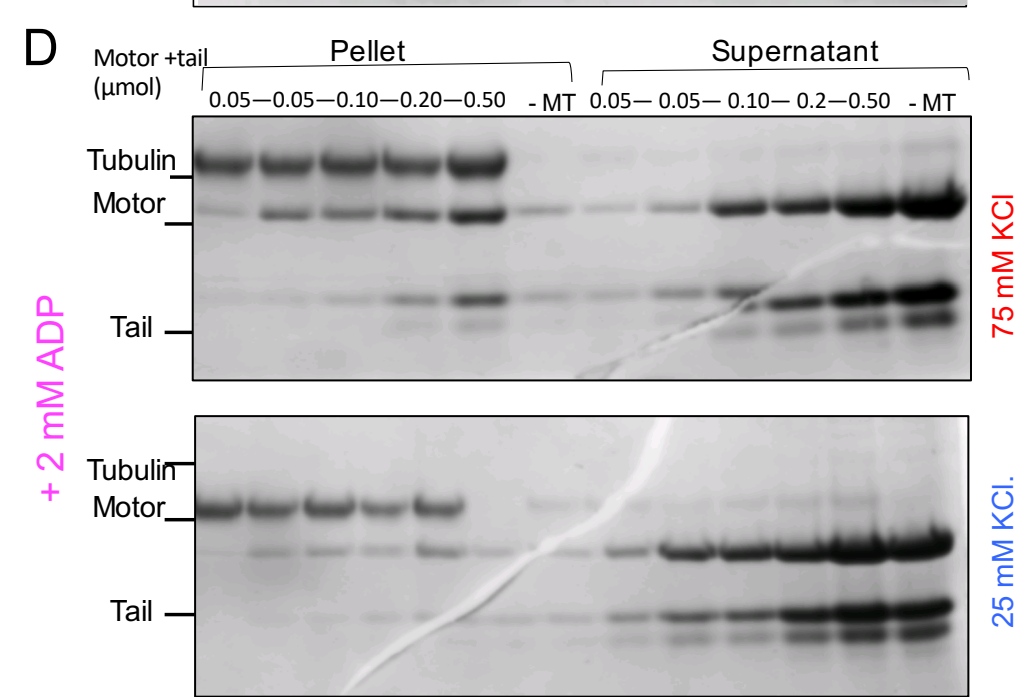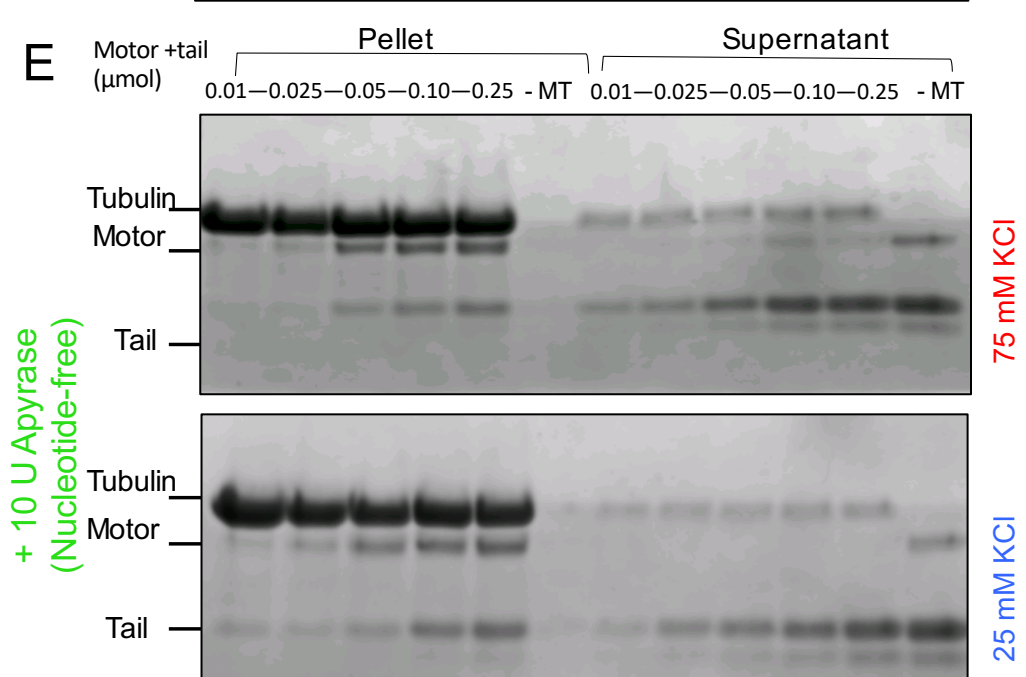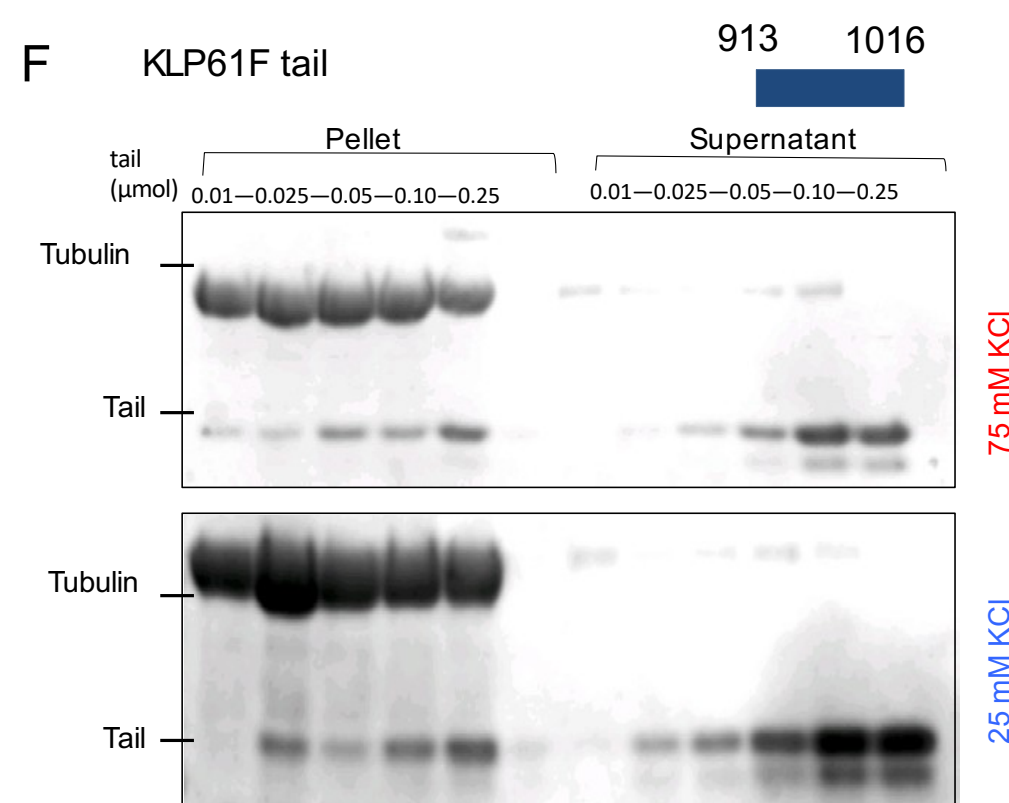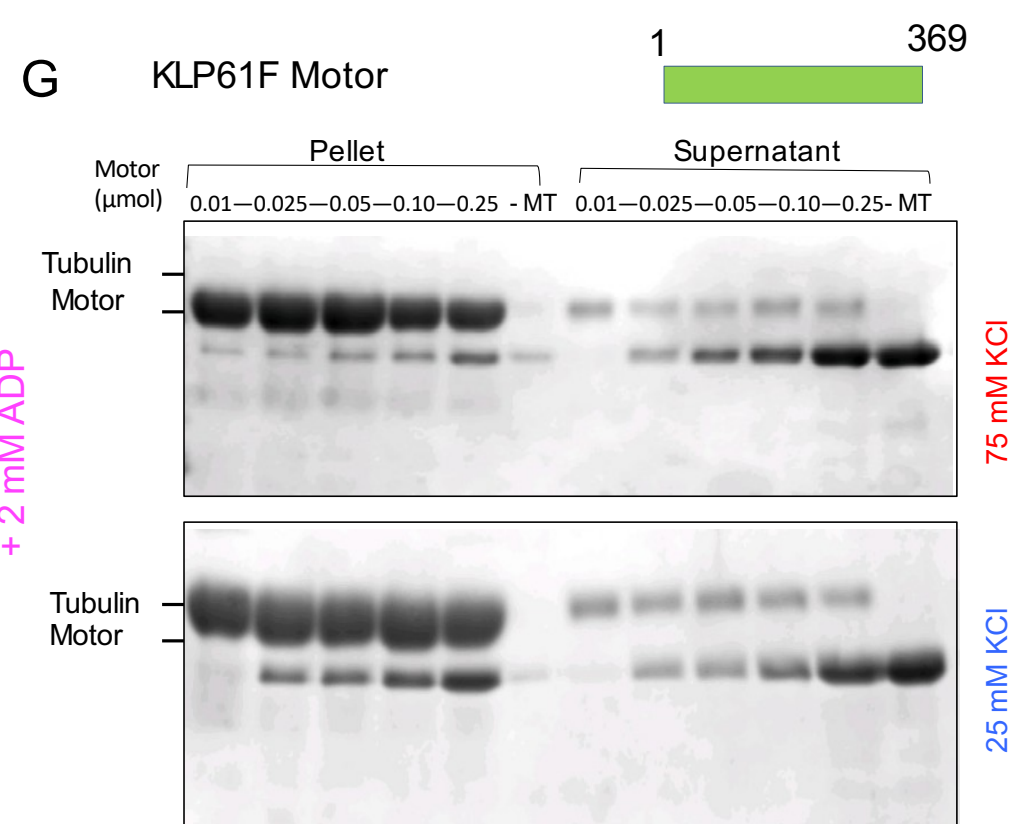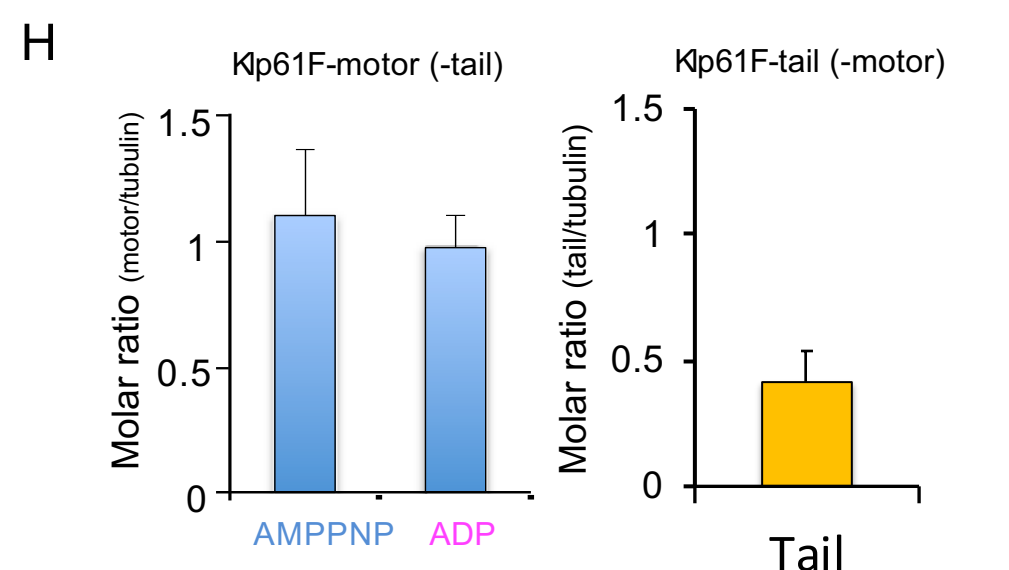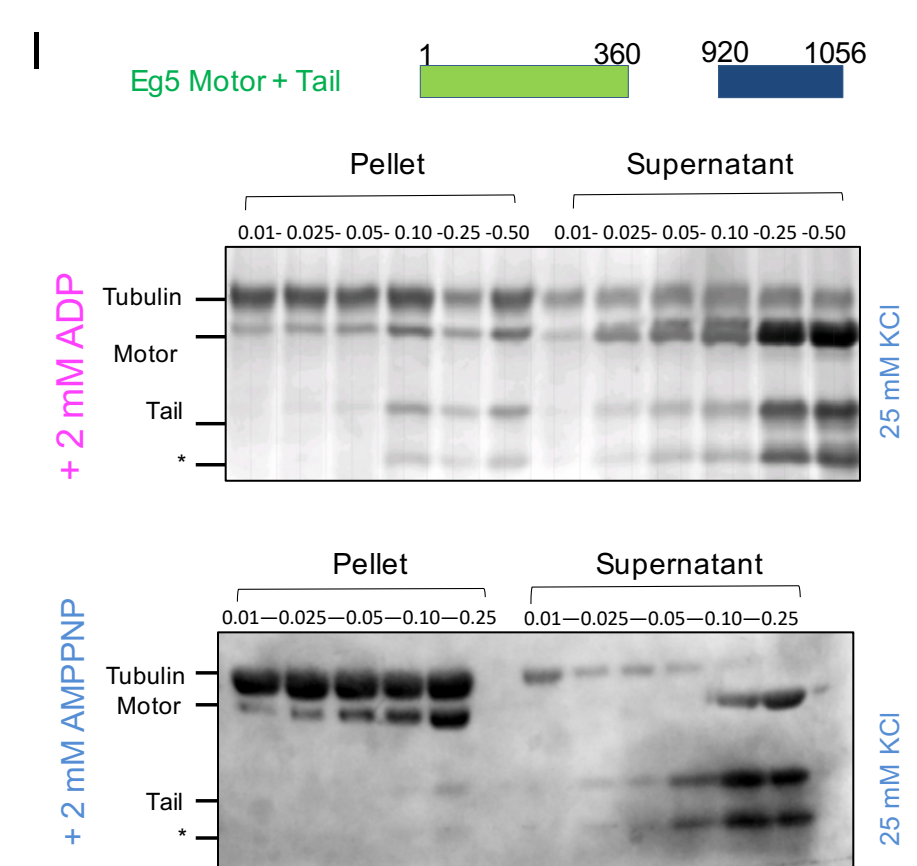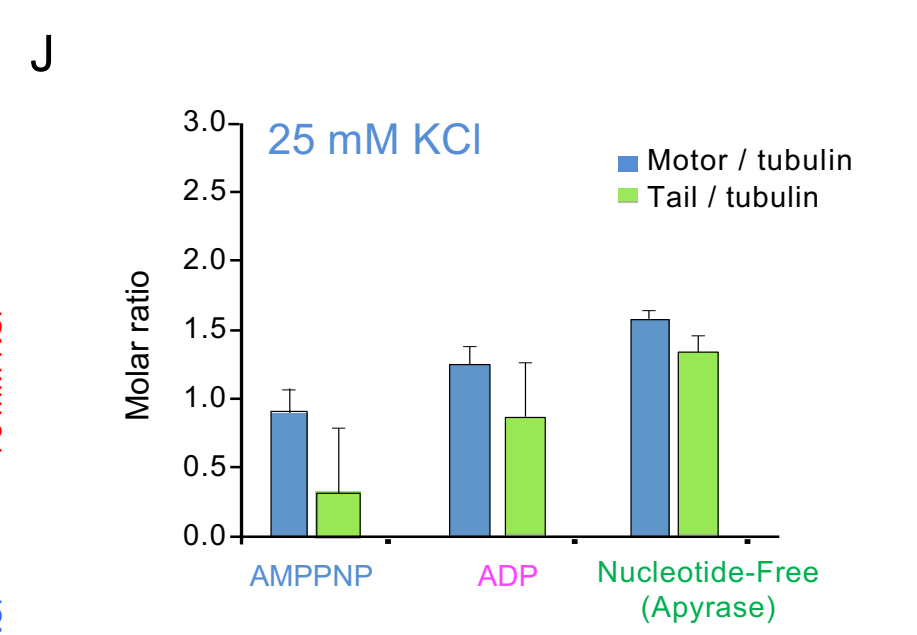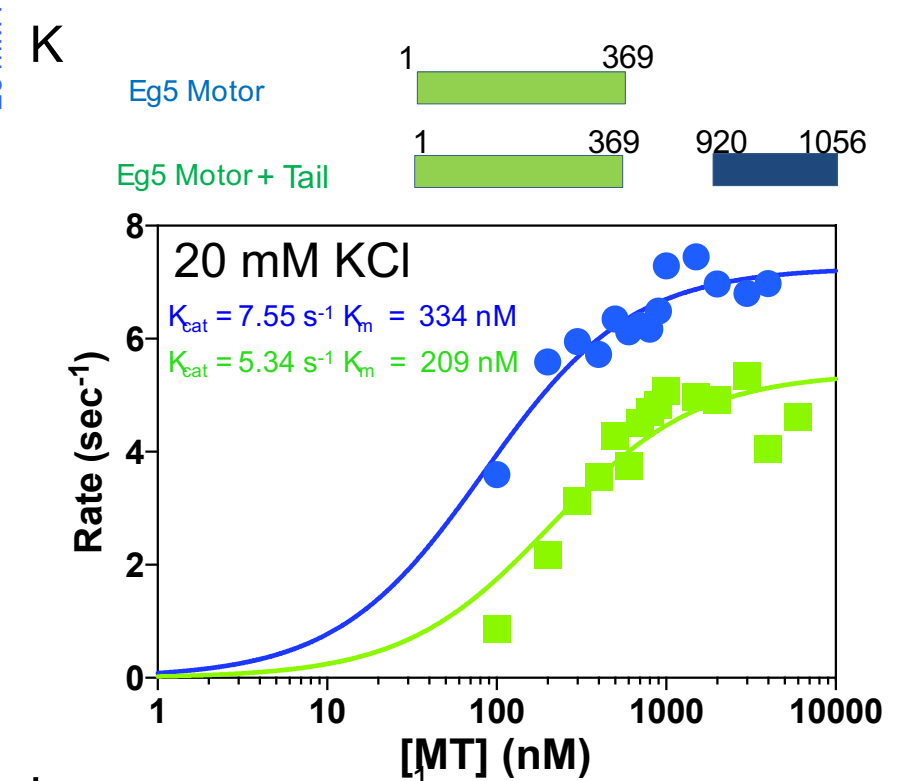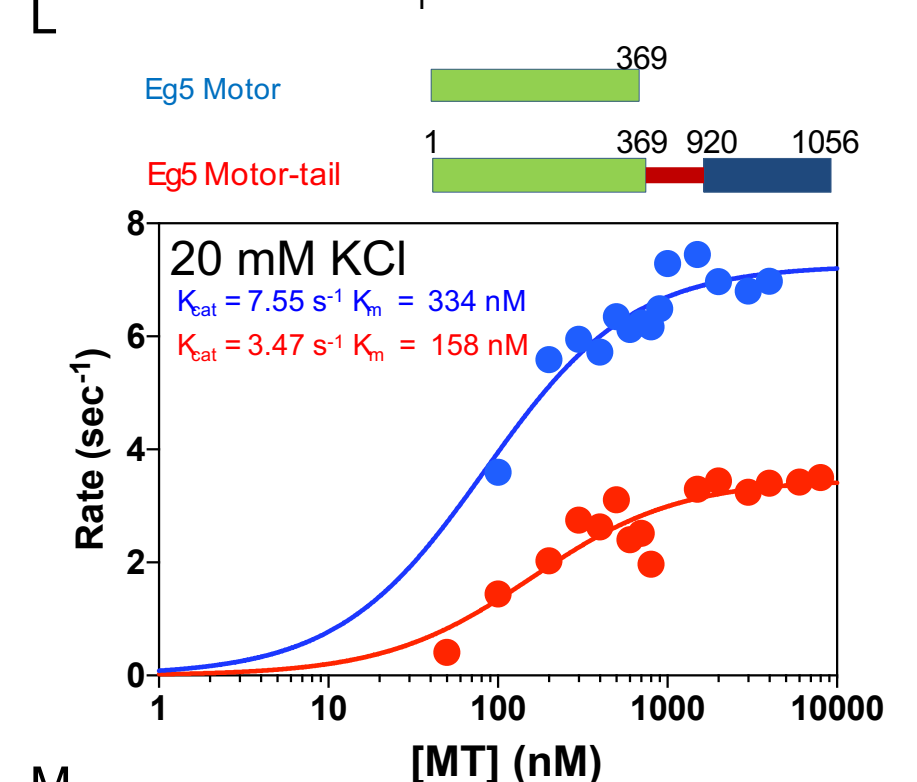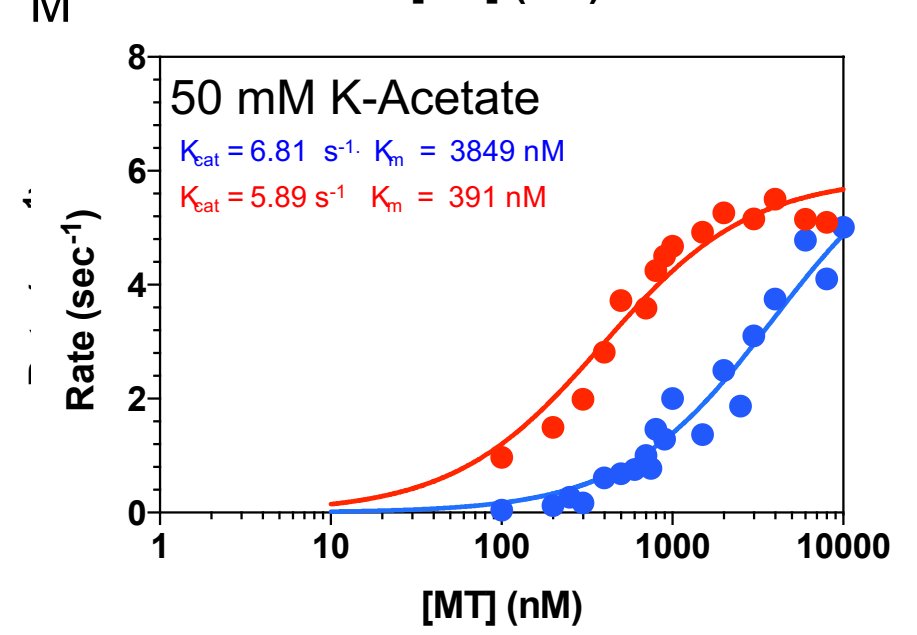

Supplement: supp [file elife-51131-supp-v1.zip]

A

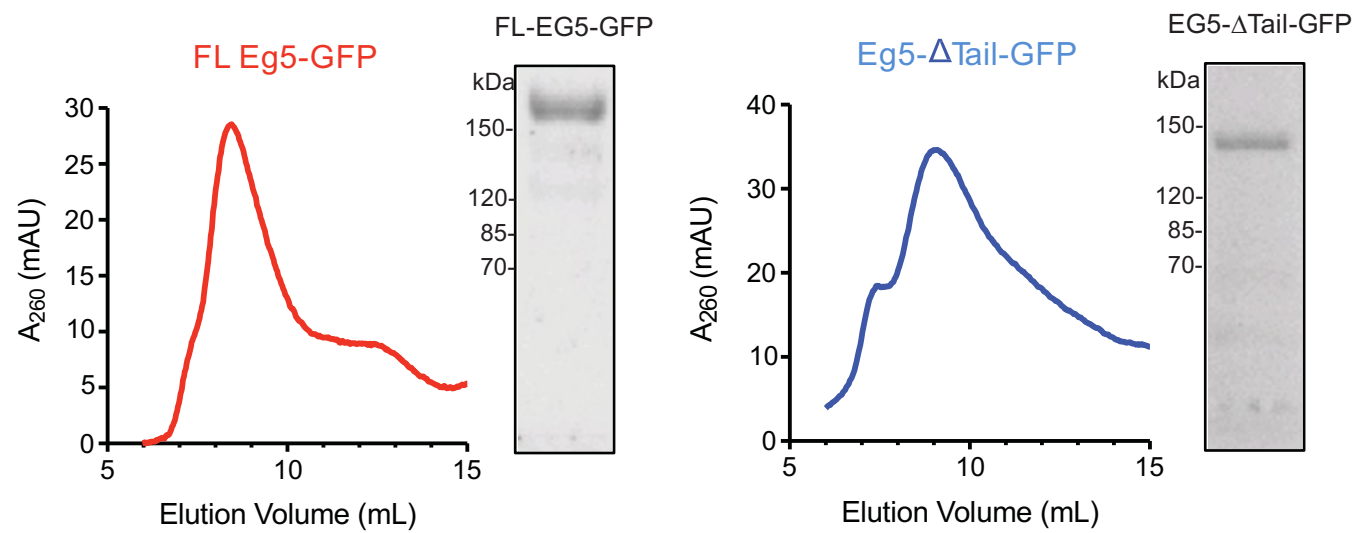

B

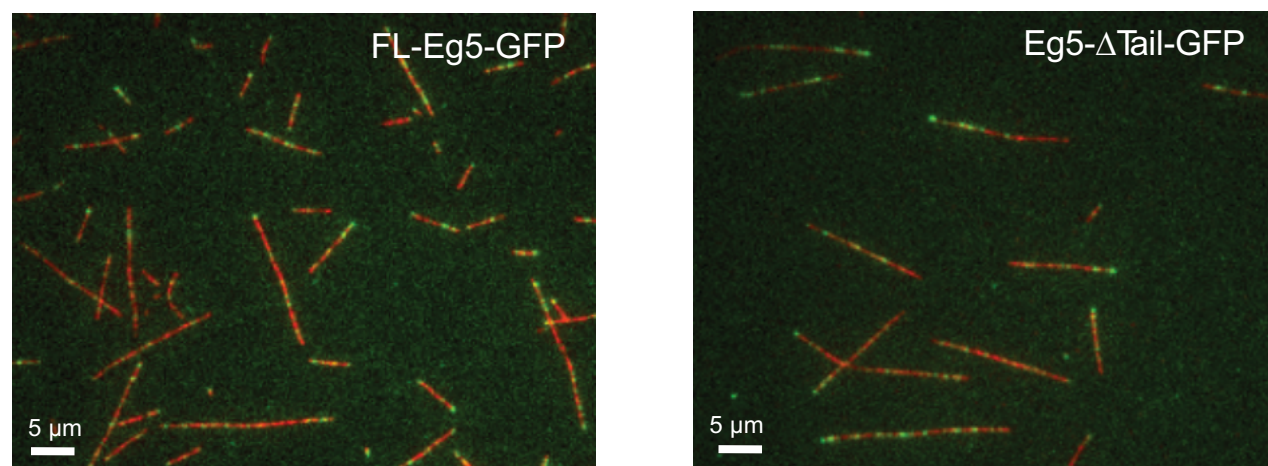

C

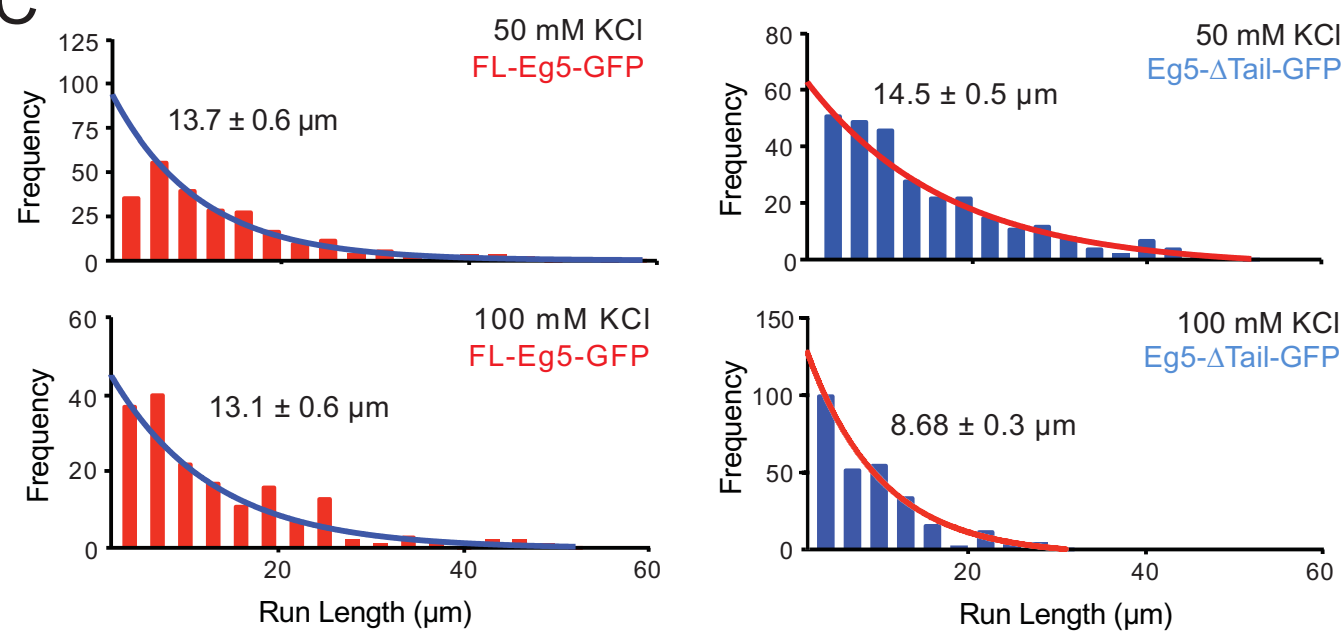

D

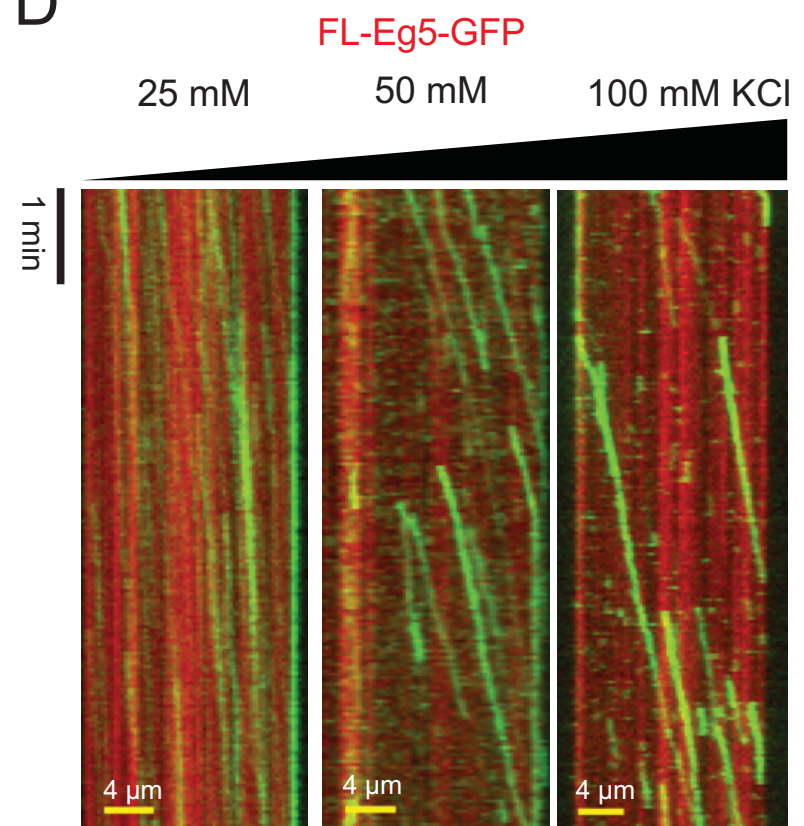

E

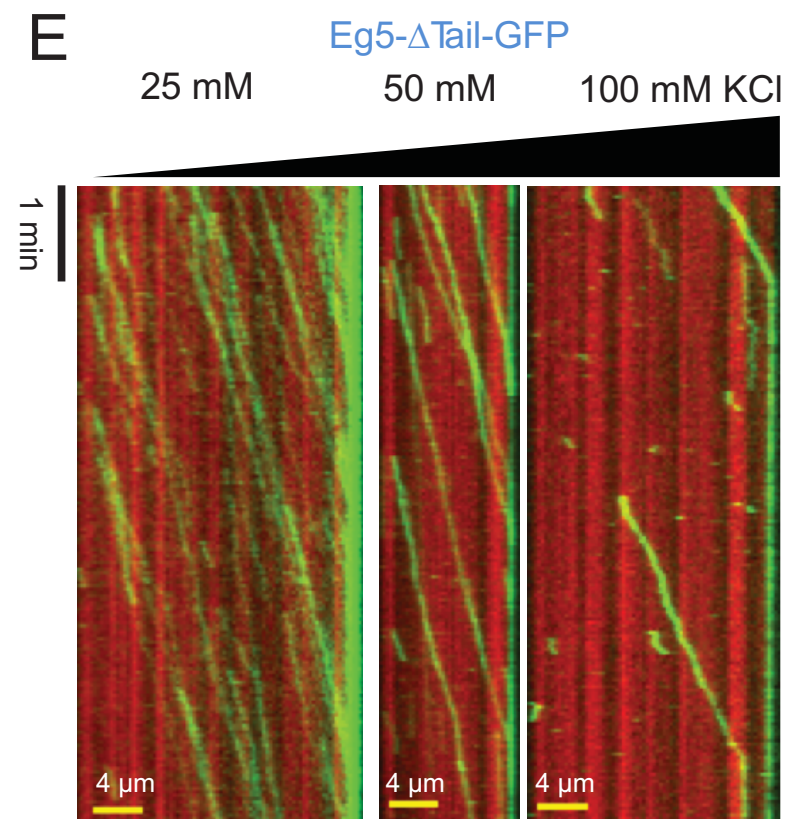

F

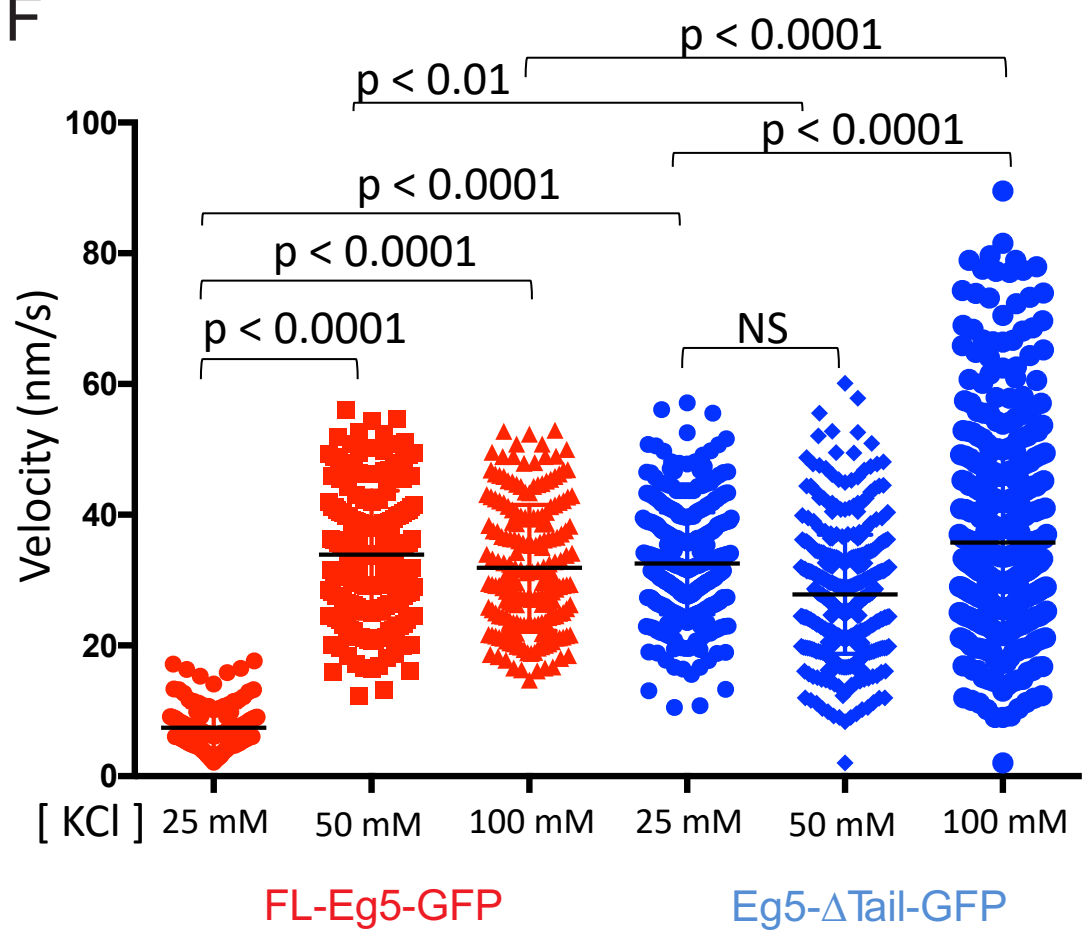

G

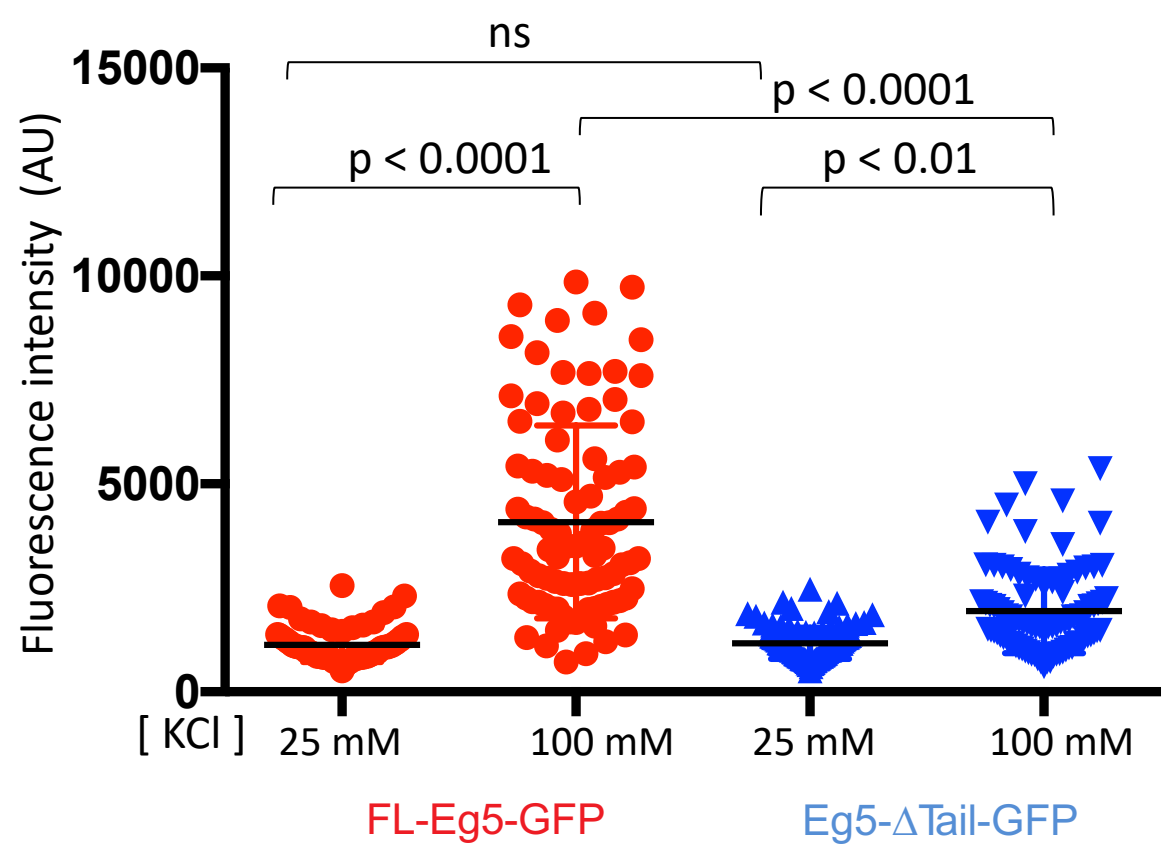

Supplement: supp [file elife-51131-supp-v1.zip]

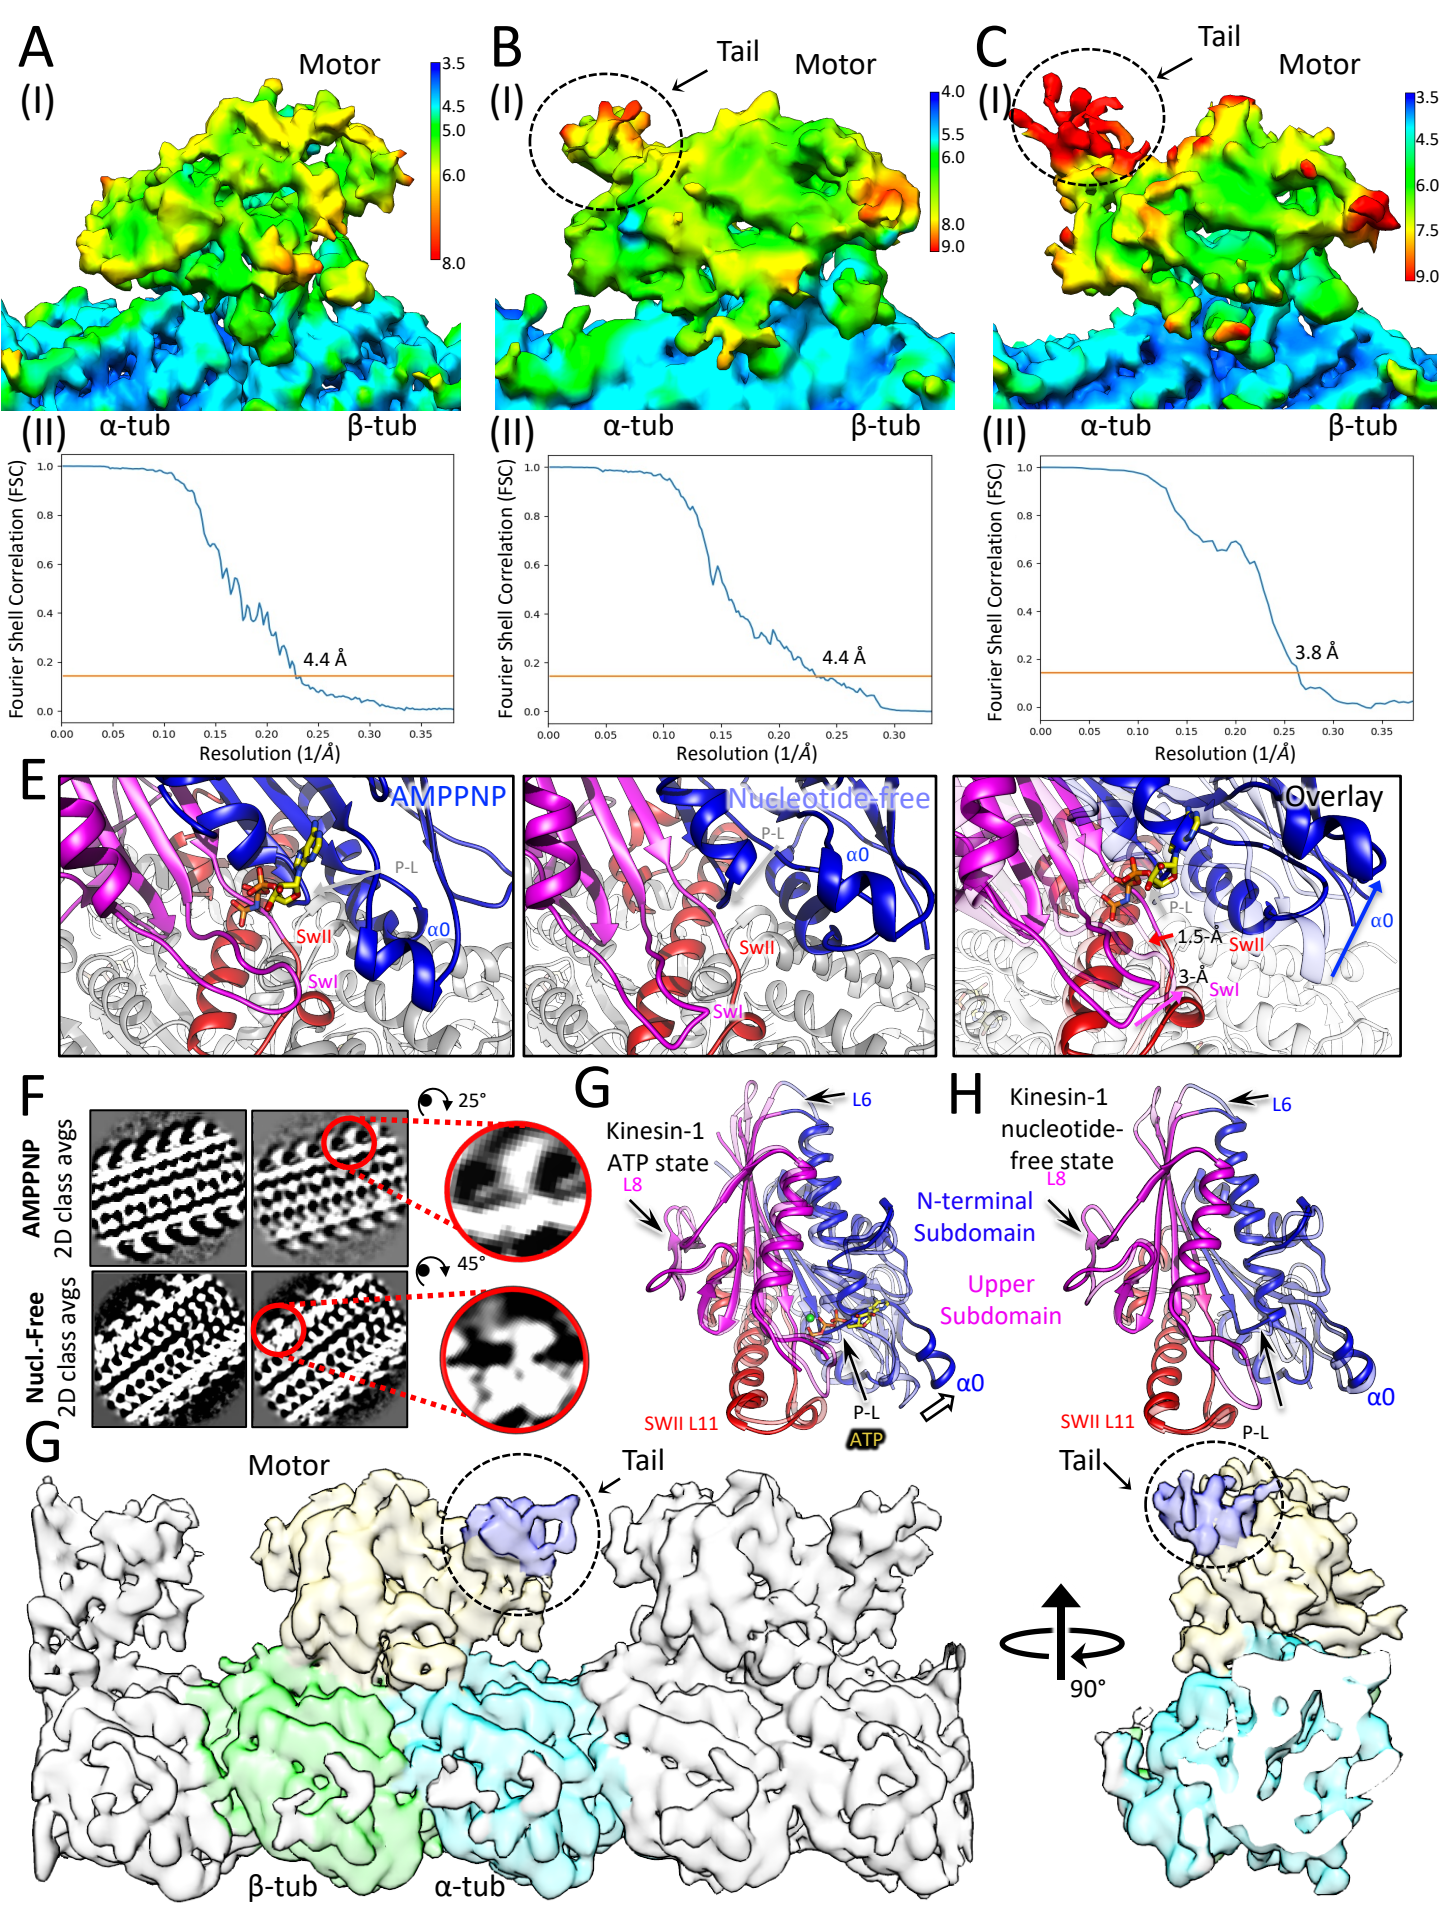

Supplement: supp [file elife-51131-supp-v1.zip]
